# Supplementary material for: Distinct Roles of CK2- and AKT-Mediated NF-κB Phosphorylations in Clasmatodendrosis (Autophagic Astroglial Death) within the Hippocampus of Chronic Epilepsy Rats
Source: MDPI journal article supplement (doi:10.3390/antiox12051020), 2023-04-28
Supplement: s1 [file s1]

# **Distinct roles of CK2 and AKT-mediated NF- $\kappa$ B phosphorylations in clasmatodendrosis (autophagic astroglial death) within the hippocampus of chronic epilepsy rats**

Ji-Eun Kim,<sup>1</sup> Duk-Shin Lee,<sup>1</sup> Tae-Hyun Kim,<sup>1</sup> Hana Park,<sup>1</sup> Tae-Cheon Kang<sup>1,\*</sup>

<sup>1</sup>Department of Anatomy and Neurobiology, Institute of Epilepsy Research, College of Medicine, Hallym University, Chuncheon 24252, Republic of Korea

\* Correspondence to: T. -C. Kang, Department of Anatomy and Neurobiology, College of Medicine, Hallym University, Chuncheon, Kangwon-Do 24252, Republic of Korea; Tel: +82-33-248-2524; Fax: +82-33-248-2525; E-mail: tckang@hallym.ac.kr

Fig. 2A

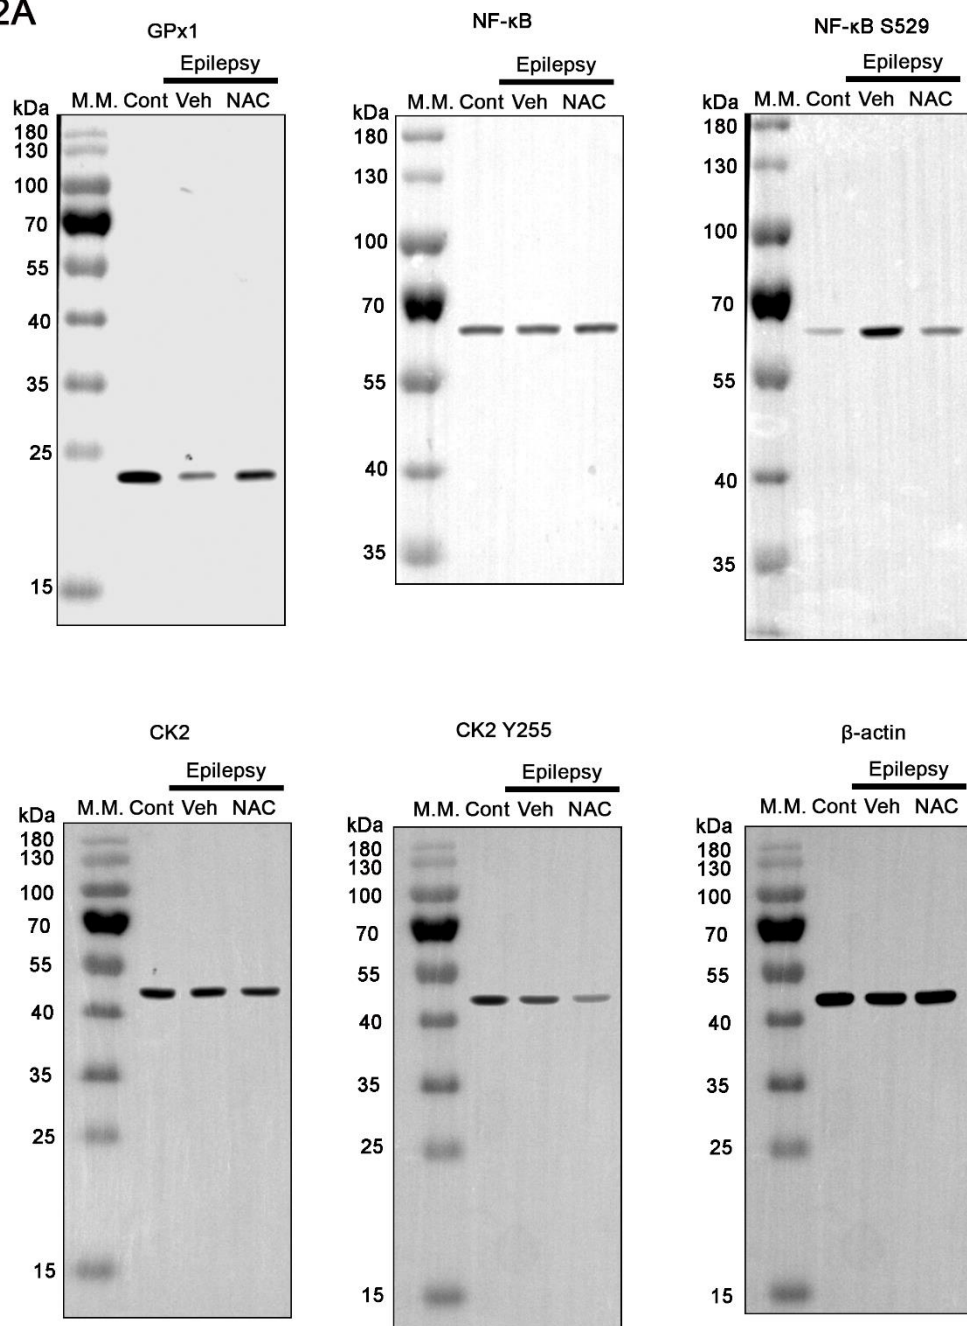

Supplementary Figure S1. Full-length gel images of Western blots in Figures 2A.

**Fig. 5A**

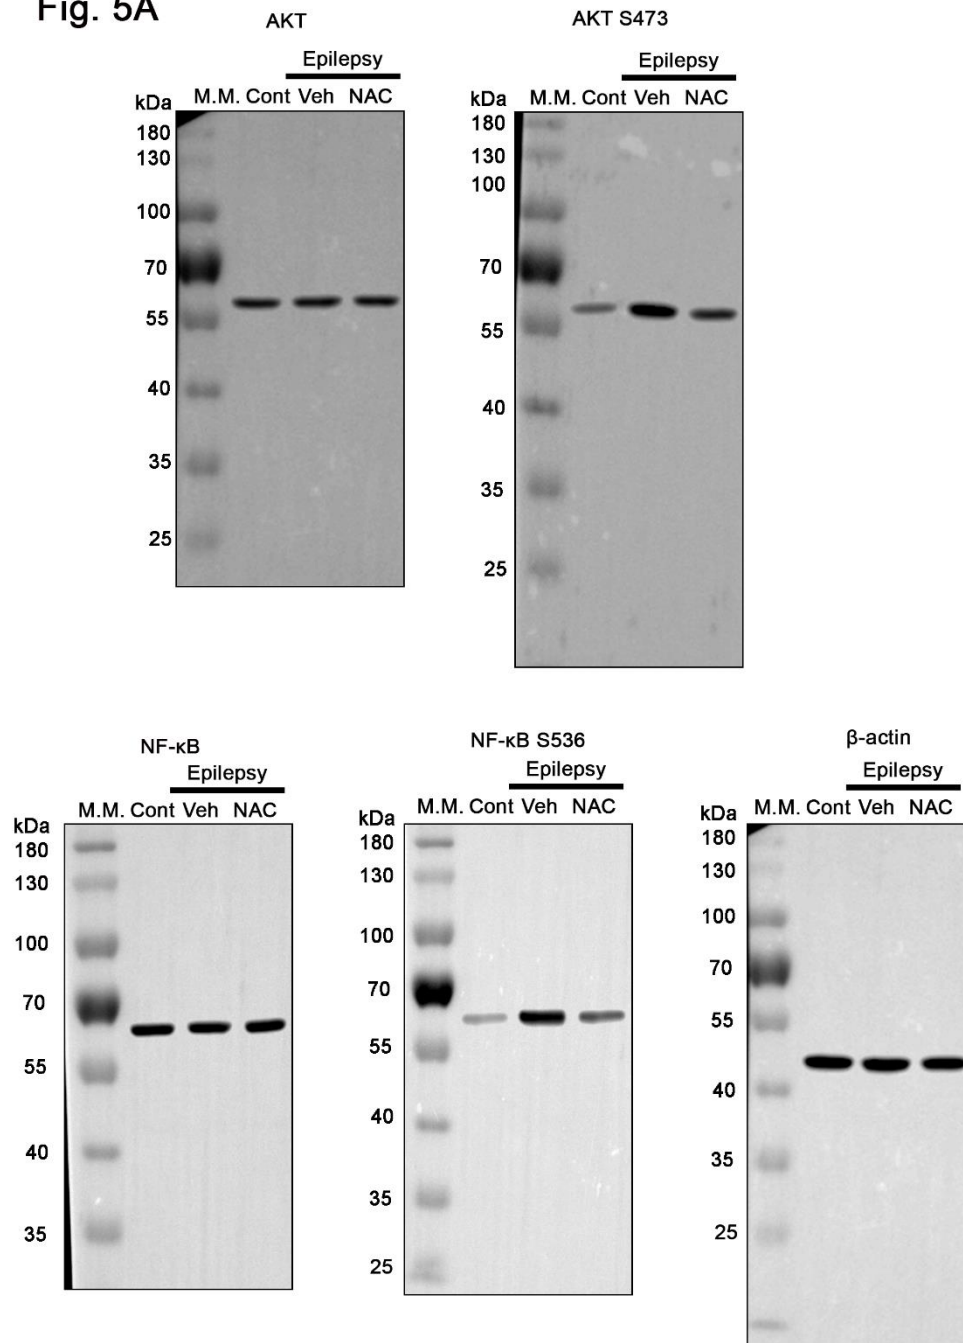

**Supplementary Figure S2. Full-length gel images of Western blots in Figures 5A.**

**Fig. 8A**

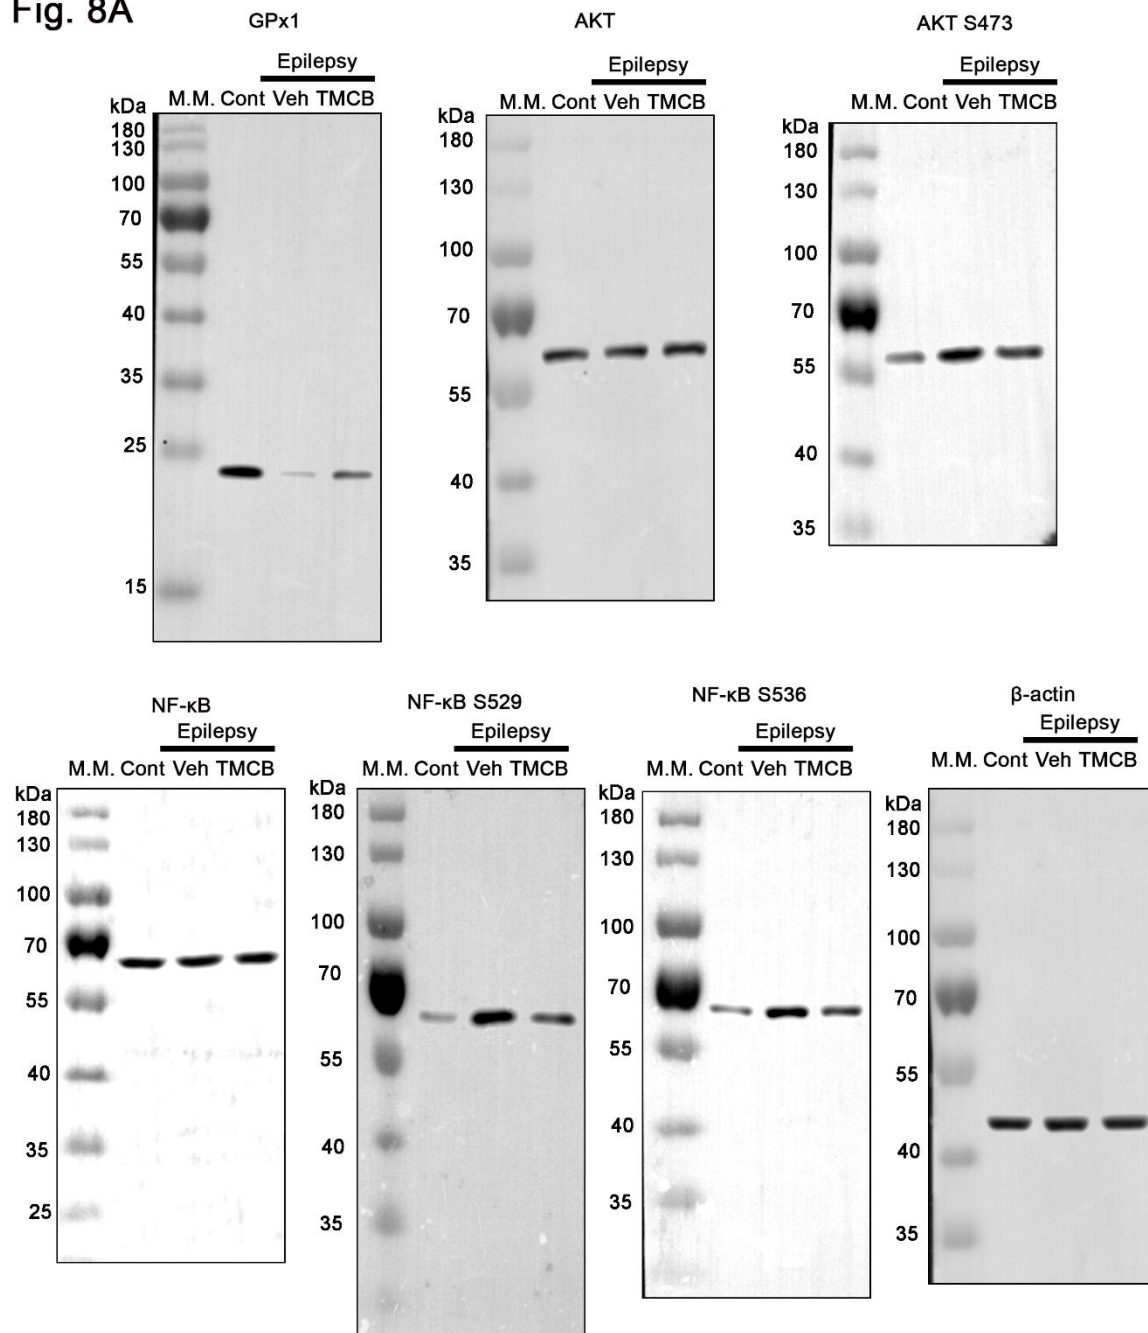

**Supplementary Figure S3. Full-length gel images of Western blots in Figures 8A.**

**Fig. 11A**

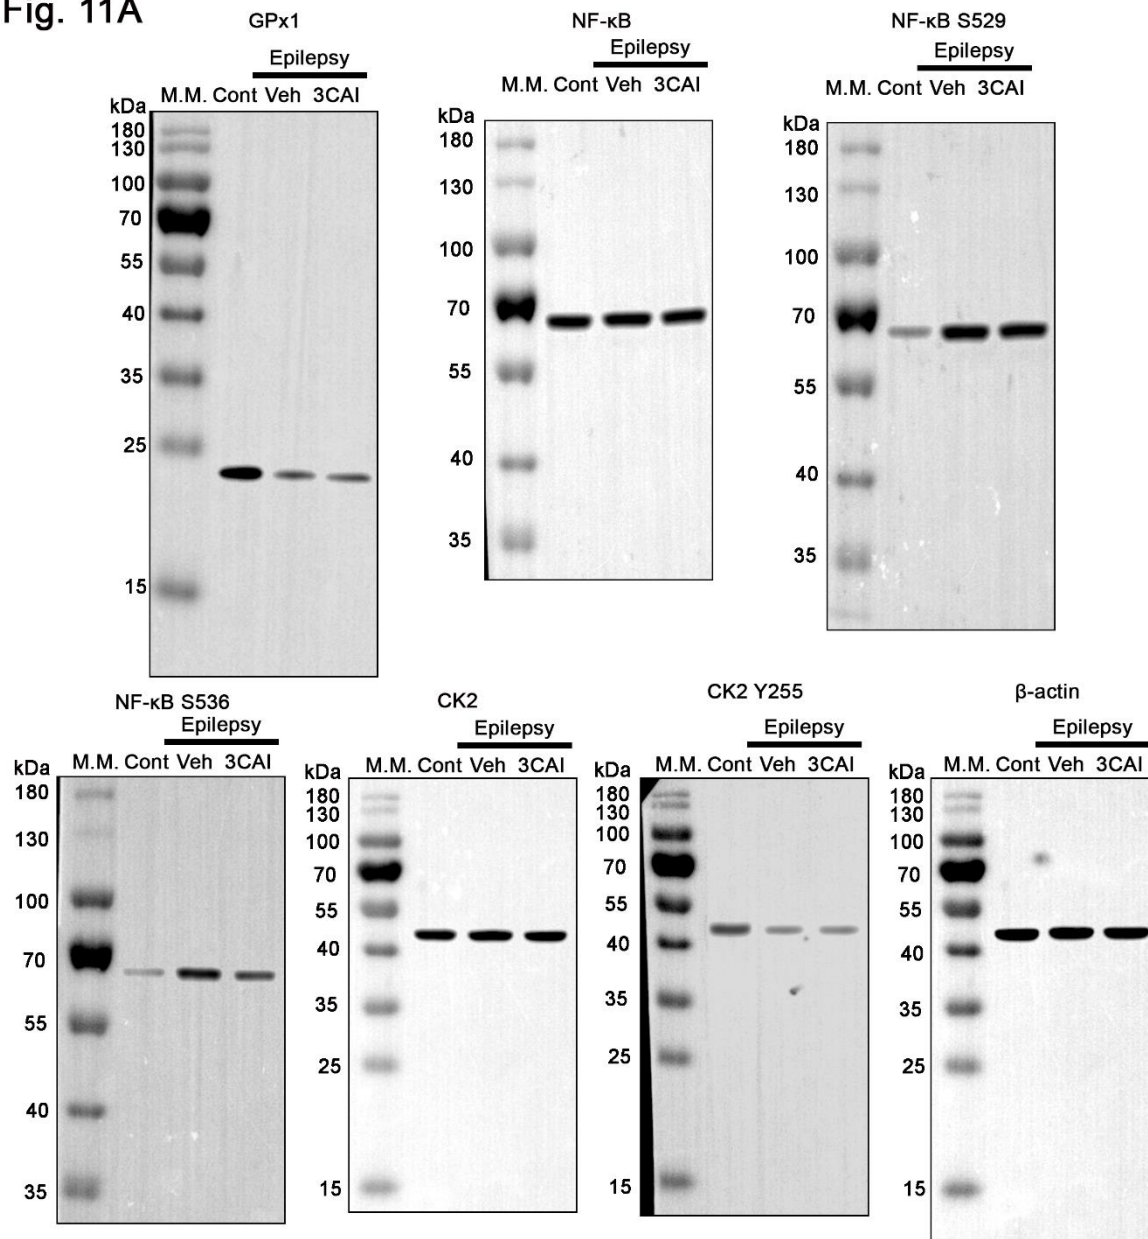

**Supplementary Figure S4. Full-length gel images of Western blots in Figures 11A.**
